# Supplementary material for: Pressure‐Driven Two‐Input 3D Microfluidic Logic Gates
Source: PubMed Central journal article supplement (PMC6974944; doi:10.1002/advs.201903027), 2019-12-17
Supplement: ADVS-7-1903027-s001.pdf [file ADVS-7-1903027-s001.pdf]

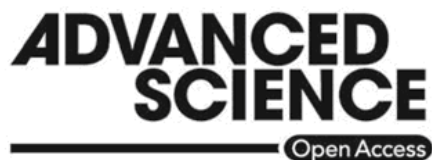

## Supporting Information

for *Adv. Sci.*, DOI: 10.1002/adv.201903027

Pressure-Driven Two-Input 3D Microfluidic Logic Gates

*Nazek El-Atab, Javier Chavarrio Canas, and Muhammad M. Hussain\**

Copyright WILEY-VCH Verlag GmbH & Co. KGaA, 69469 Weinheim, Germany, 2019.

## Supporting Information

### Pressure-Driven Two-Input 3D Microfluidic Logic Gates

*Nazek El-Atab, Javier Chavarrio Canas and Muhammad M. Hussain\**

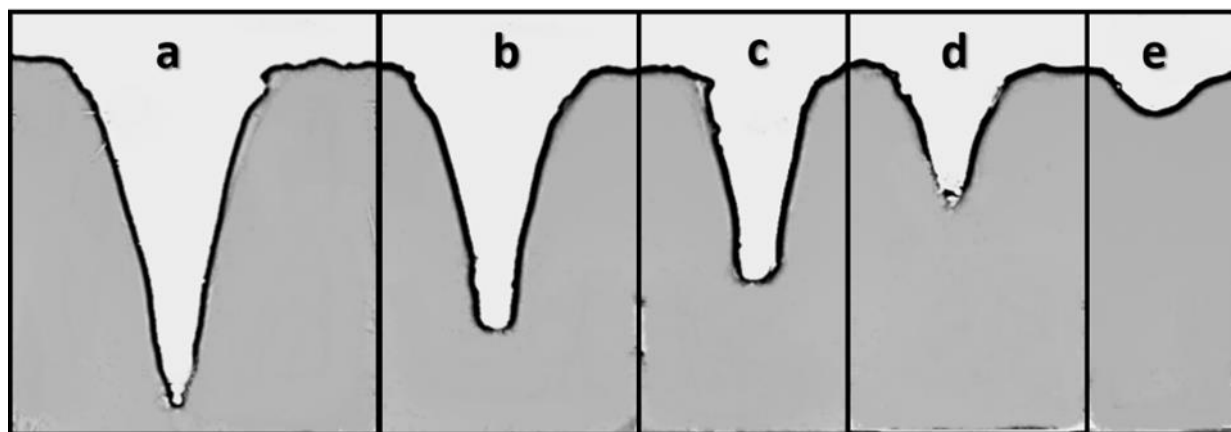

**Figure S1.** Optical images of the microchannels obtained by laser ablating PMMA sheets using the same laser power and speed ( $P = 20\%$ ,  $S = 6\%$ ) but for different widths a)  $250\ \mu\text{m}$ , b)  $200\ \mu\text{m}$ , c)  $150\ \mu\text{m}$ , d)  $100\ \mu\text{m}$ , e)  $50\ \mu\text{m}$ . The images show that for different widths, the depths of the channels is also changed.

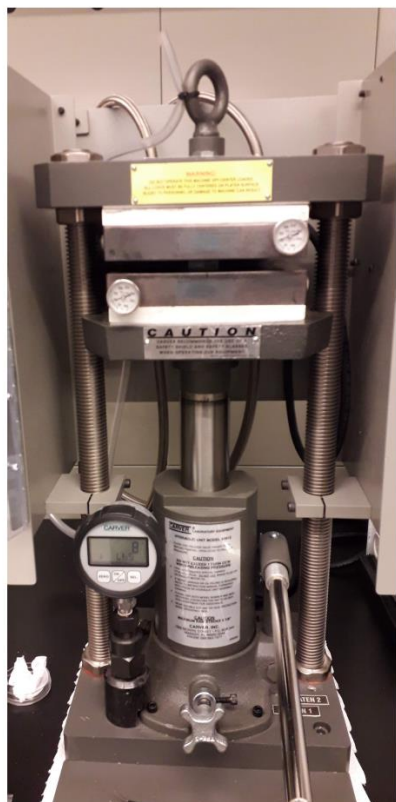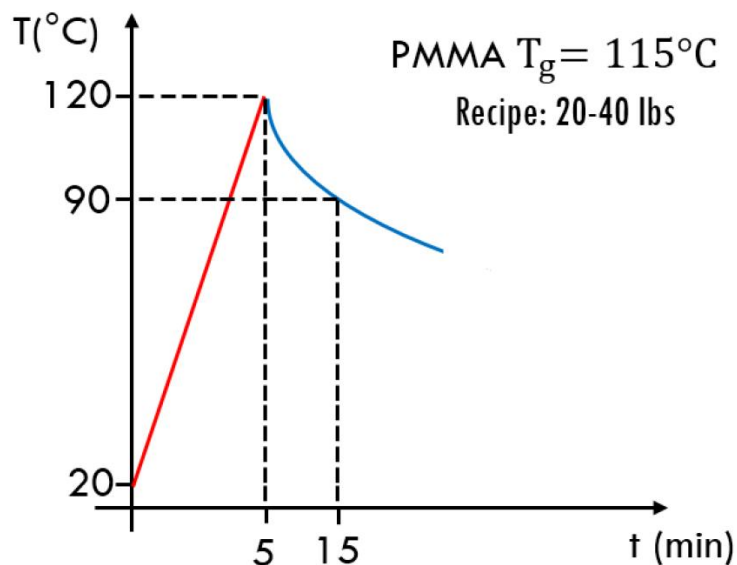

**Figure S2.** Thermo-compression tool used to bond the PMMA layers in the microfluidics device with the applied bonding recipe.

**Video S1.** Operation of the microfluidic logic gate with input  $AB'=1$  where yellow colored water is inserted. The OR output is turned on while the AND output shows no fluidic output.

**Video S2.** Operation of the microfluidic logic gate with input  $A'B=1$  where blue colored water is inserted. The OR output is turned on while the AND output shows no fluidic output.

**Video S3.** Operation of the microfluidic logic gate with input  $AB=1$  where yellow and blue colored water are inserted. The OR and AND outputs are turned on showing a green colored water which confirms the mixing of the two inputs (yellow and blue).

**Video S4.** Operation of the microfluidic half adder with input  $A'B=1$  where yellow colored water is inserted. The sum output is turned on while the carry output shows no fluidic output.

**Video S5.** Operation of the microfluidic half adder with input  $AB'=1$  where light-pink colored water is inserted. The sum output is turned on while the carry output shows no fluidic output.

**Video S6.** Operation of the microfluidic half adder with input  $AB=1$  where yellow and light-pink died water are inserted. The carry output in this case is turned on showing fluidic output unlike the sum output.
